# Supplementary material
Source: PubMed Central journal article supplement (PMC5068165)
Supplement: AEM.01448-16_zam999117451so1.pdf [file AEM.01448-16_zam999117451so1.pdf]

## Supplemental Material

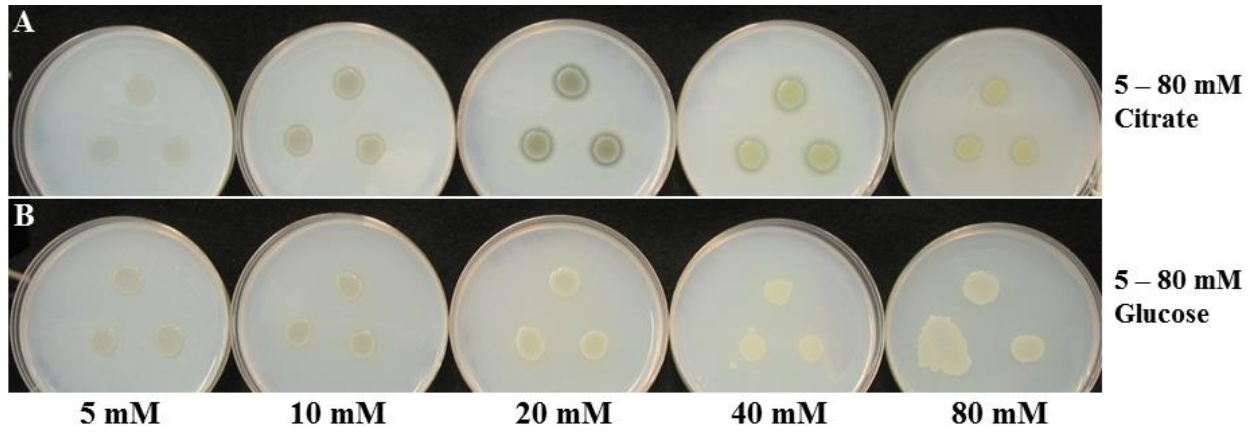

**SUPPLEMENTAL FIGURE S1. Impact of citrate and glucose concentrations on Impranil clearing.** *P. protegens* strain Pf-5 grown on M9 agar with 3 g/L Impranil containing (A) 5 to 80 mM citrate and (B) 5 to 80 mM glucose after 48 hours of growth at 27 °C.

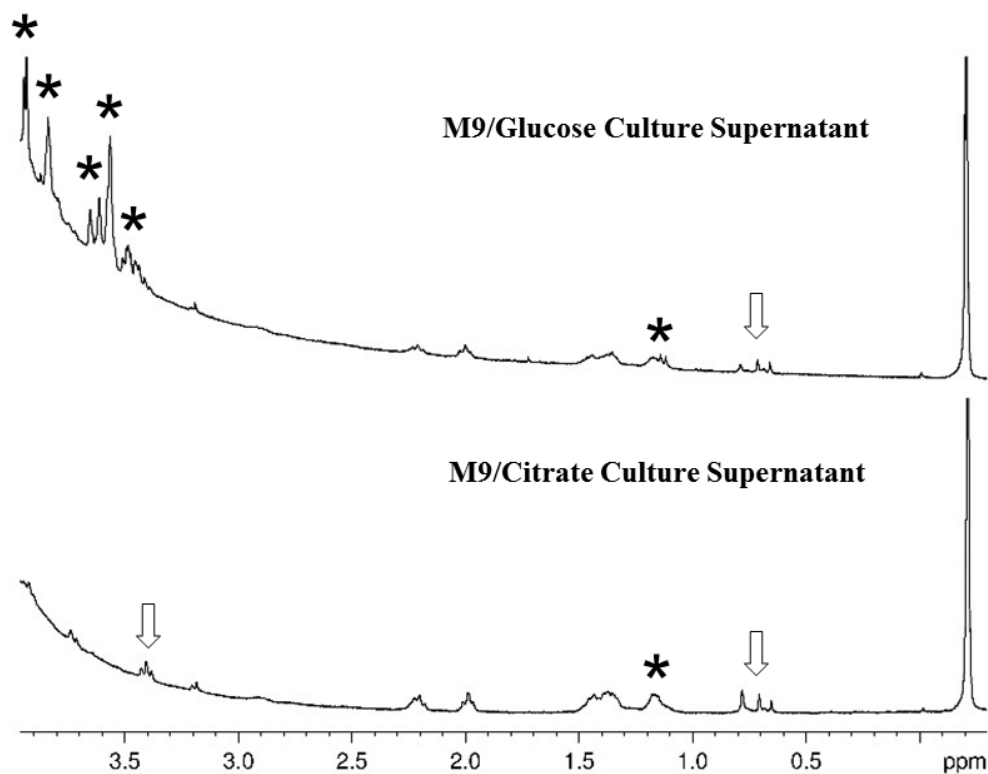

**SUPPLEMENTAL FIGURE S2. Identification of Impranil degradation products in Pf-5 culture supernatants post-Impranil clearing assays.** Cell-free culture supernatants of *P. protegens* strain Pf-5 grown in M9 medium supplemented with different carbon sources were used in Impranil clearing assay. Post-Impranil clearing samples were subjected to NMR analysis to quantify concentration of soluble PU hydrolysis products. Representative <sup>1</sup>H NMR data from the degradation of Impranil using *P. protegens* Pf-5 cultures supernatants grown in M9 media supplemented with either 20 mM glucose (top panel) or 20 mM citrate (bottom panel) are shown to the same ordinate scale. Peaks used for integrated area calculations are indicated with open arrows. \* represents signals that are also present in the initial supernatant without exposure to Impranil.

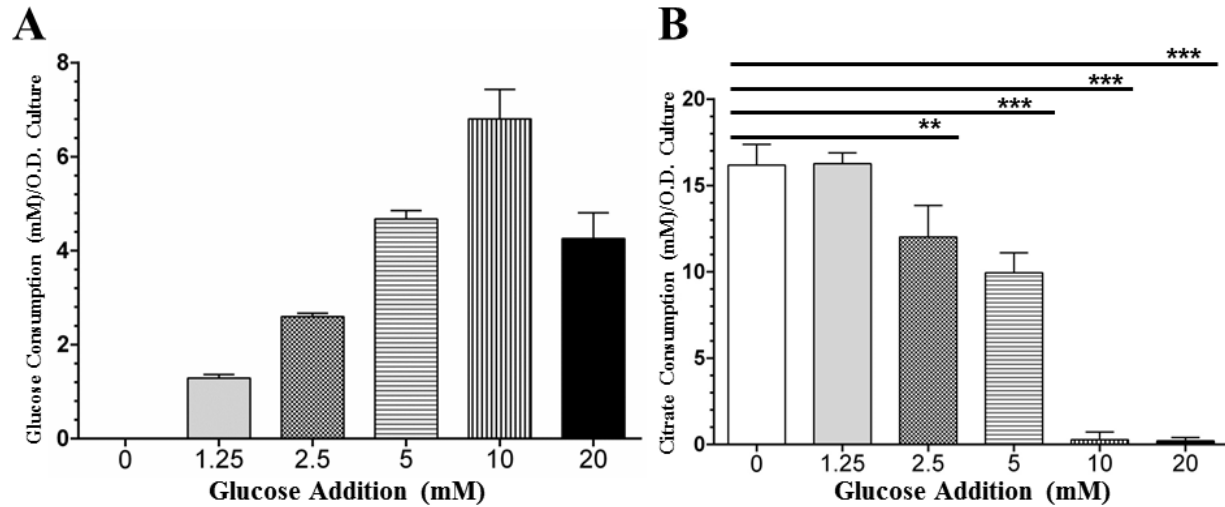

**SUPPLEMENTAL FIGURE S3. Glucose and citrate consumption after 22 hours growth in M9 + 20 mM citrate media supplemented with varying concentrations of glucose.** Cultures of strain Pf-5 were grown for 22 hours in M9/citrate medium supplemented with varying concentrations of glucose. Cell-free supernatants of these cultures were subjected to HPLC analysis to determine levels of glucose (**A**) and citrate (**B**) consumption. \*\*,  $p < 0.001$ ; \*\*\*,  $p < 0.0001$ .

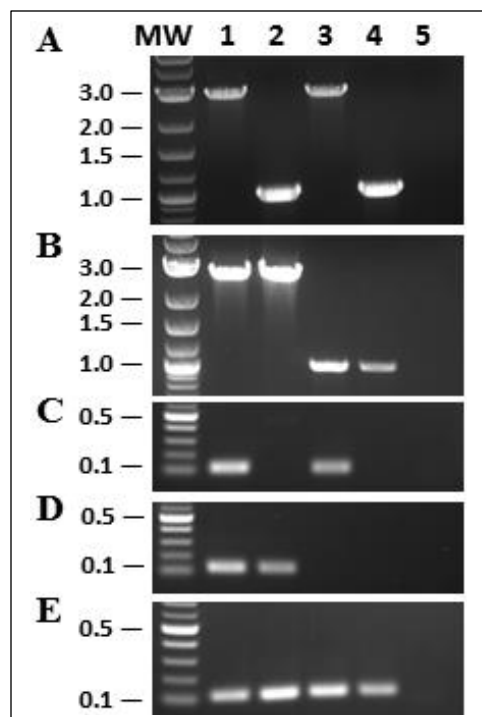

**SUPPLEMENTAL FIGURE S4. Verification of mutants by PCR.** Genomic DNA of *P. protegens* strain Pf-5 wild type (Lane 1), *pueA* deletion mutant (Pf5 $\Delta$ *pueA*, Lane 2), *pueB* deletion mutant (Pf5 $\Delta$ *pueB*, Lane 3), and *pueA/pueB* double deletion mutant (Pf5 $\Delta$ *pueAB*, Lane 4) were analyzed by PCR to confirm their identities. Negative control samples (Lane 5) in which water was used as template were included for each analysis. **(A)** PCR amplification using primers corresponding to regions outside of *pueA* gene (Pf5*pueA*TestF and Pf5*pueA*TestR) resulted in the appearance of a 2.85 kB or a 1.0 kB product for wild type sequence or *pueA* deletion, respectively. **(B)** Similarly, using primers corresponding to regions outside of *pueB* gene (Pf5*pueB*TestF and Pf5*pueB*TestR) resulted in the appearance of a 2.69 kB or a 1.0 kB product for wild type sequence or *pueB* deletion, respectively. **(C-D)** Primers corresponding to *pueA* (*pueAF* and *pueAR*) (C) and *pueB* (*pueBF* and *pueBR*) (D) gene sequences were also used to further confirm either the presence (0.1 kB band) or the removal (lack of PCR products) of the respective genes. **(E)** Primers corresponding to *ropD* gene (*rpoDF* and *rpoDR*) were used as positive control for PCR reaction, which yield a 0.1 kB product band.

### **Identification of putative Cbr/crc catabolite repression system in *P. protegens* Pf-5.**

Using the blastp algorithm (<http://blast.ncbi.nlm.nih.gov/Blast.cgi>), the amino acid sequence from Crc of *P. aeruginosa* strain PAO1 (AAC44428.1) was compared to protein sequences derived from the *P. protegens* strain Pf-5 genome. Highest similarity was found with exodeoxyribonuclease III (YP\_263115.1). A pairwise alignment of both proteins using the Stretcher software resulted in 88.8 % identity.

Using blastn algorithm (<http://blast.ncbi.nlm.nih.gov/Blast.cgi>), we found two stretches of nucleotide sequences not yet annotated in the Pf-5 genome that possibly encode regulatory RNAs similar to CrcZ from *Pseudomonas aeruginosa* PAO1 (GeneID 9793394: 63-469). Highest identities (76 % and 69 %) were found with a nucleotide sequence (6040962-6041319) located between the genes encoding the two component response regulator CbrB and the poly(A) polymerase PcnB, and with a nucleotide sequence (4546200 – 4546573) positioned between the genes encoding a possible hydroxymethylglutaryl-CoA lyase (LiuE) and a potential long-chain-fatty-acid-CoA ligase, respectively.

## Supplemental Table S1. Mascot Database Search Results of Band 6A.

### Protein Best Hit

[gi|4558791](#) Mass: 64784 Score: 390 Queries matched: 6

polyurethanase esterase A [*Pseudomonas chlororaphis*]

[gi|70730566](#) Mass: 64900 Score: 390 Queries matched: 6

polyurethanase A [*Pseudomonas fluorescens* Pf-5]

### Peptide Summary Report

| <u>Start - End</u> <sup>a</sup> | <u>Observed</u> | <u>Mr(expt)</u> | <u>Mr(calc)</u> | <u>ppm</u> | <u>Miss</u> | <u>Score</u> | <u>Expect</u> | <u>Rank</u> | <u>Peptide</u> <sup>b</sup>    |
|---------------------------------|-----------------|-----------------|-----------------|------------|-------------|--------------|---------------|-------------|--------------------------------|
| 127 - 141                       | 1676.7279       | 1675.7206       | 1675.8318       | -66.34     | 0           | 32           | 50            | 1           | K.YDAQGHLESIGIAFR.G            |
| 247 - 259                       | 1535.6846       | 1534.6773       | 1534.7780       | -65.59     | 0           | 52           | 0.41          | 1           | K.VLNIGYENDPVFR.A              |
| 337 - 350                       | 1457.6620       | 1456.6547       | 1456.7522       | -66.89     | 0           | 75           | 0.0023        | 1           | K.DSTIVVANLSDPAR.A             |
| 351 - 359                       | 1189.5187       | 1188.5114       | 1188.5887       | -65.04     | 0           | 69           | 0.0077        | 1           | R.ASTWVQDLNR.N                 |
| 367 - 391                       | 2642.0713       | 2641.0640       | 2641.2256       | -61.18     | 0           | 81           | 0.00068       | 1           | K.GSTFIIGSDGNDLIQGGSGNDYLEGR.A |
| 480 - 491                       | 1337.5940       | 1336.5867       | 1336.6735       | -64.94     | 0           | 84           | 0.00023       | 1           | K.AGGQLTQYASSVR.G              |

<sup>a</sup>Start – End” numbering correspond to the amino acid residue numbers of Pf-5 PueA protein that matches the corresponding peptide.

<sup>b</sup>Matching tryptic-fragment peptide sequences are underlined.

## Supplemental Table S2. Mascot Database Search Results of Band 1B.

### Protein Best Hit

[gi|346642991](#) Mass: 59059 Score: 389 Queries matched: 6

polyurethanase B [Pseudomonas fluorescens Pf-5]

### Peptide Summary Report

| <u>Start - End</u> <sup>a</sup> | <u>Observed</u> | <u>Mr(expt)</u> | <u>Mr(calc)</u> | <u>ppm</u> | <u>Miss</u> | <u>Score</u> | <u>Expect</u> | <u>Rank</u> | <u>Peptide</u> <sup>b</sup> |
|---------------------------------|-----------------|-----------------|-----------------|------------|-------------|--------------|---------------|-------------|-----------------------------|
| 79 - 93                         | 1626.7526       | 1625.7453       | 1625.8413       | -59.04     | 0           | 41           | 5.3           | 1           | K.YDASGQLLSIGISFR.G         |
| 100 - 119                       | 2159.8811       | 2158.8738       | 2158.9920       | -54.72     | 0           | 49           | 0.84          | 1           | K.DGINDLQAAFVSGFADNYSR.L    |
| 268 - 279                       | 1443.6277       | 1442.6204       | 1442.7041       | -58.03     | 0           | 92           | 3.8e-05       | 1           | R.LINSDFYDLTSR.D            |
| 280 - 293                       | 1504.7078       | 1503.7005       | 1503.7893       | -59.02     | 1           | 45           | 2.2           | 1           | R.DSTVVISNLSEGKR.D          |
| 328 - 340                       | 1324.4631       | 1323.4558       | 1323.5327       | -58.12     | 0           | 75           | 0.00064       | 1           | K.GNDYLDGGAGDDR.F           |
| 367 - 381                       | 1655.7068       | 1654.6995       | 1654.7951       | -57.75     | 0           | 87           | 0.00014       | 1           | K.NFSIANDGDGTLYIR.D         |

<sup>a</sup>"Start - End" numbering correspond to the amino acid residue numbers of Pf-5 PueB protein that matches the corresponding peptide.

<sup>b</sup>Matching tryptic-fragment peptide sequences are underlined.
